# Supplementary material
Source: PubMed Central journal article supplement (PMC3672907)
Supplement: fj.11-183350.st1.pdf [file fj.11-183350.st1.pdf]

## Supplemental Tables 1a and b

Supplemental Table 1a :Characteristics of male and female *Cav-1<sup>+/+</sup> Apoe<sup>-/-</sup>* and *Cav-1<sup>-/-</sup> Apoe<sup>-/-</sup>* mice

|                                                        | <i>Cav-1<sup>+/+</sup> Apoe<sup>-/-</sup></i> | <i>Cav-1<sup>-/-</sup> Apoe<sup>-/-</sup></i> | <i>Cav-1<sup>+/+</sup> Apoe<sup>-/-</sup></i> | <i>Cav-1<sup>-/-</sup> Apoe<sup>-/-</sup></i> |
|--------------------------------------------------------|-----------------------------------------------|-----------------------------------------------|-----------------------------------------------|-----------------------------------------------|
|                                                        | Male                                          |                                               | female                                        |                                               |
| plaque size ( $\mu\text{m}^2 \times 10^5$ )            | 0.47 $\pm$ 0.12                               | 0.07 $\pm$ 0.02                               | 0.53 $\pm$ 0.19                               | 0.17 $\pm$ 0.08                               |
| individual plaque area ( $\mu\text{m}^2 \times 10^5$ ) | 0.15 $\pm$ 0.04                               | 0.04 $\pm$ 0.01                               | 0.12 $\pm$ 0.04                               | 0.07 $\pm$ 0.02                               |
| plaque number / aortic arch                            | 2.10 $\pm$ 0.21                               | 1.30 $\pm$ 0.14                               | 2.10 $\pm$ 0.26                               | 2.00 $\pm$ 0.41                               |
| CD3 <sup>+</sup> cells (% of total cells)              | 4.15 $\pm$ 0.81                               | 3.96 $\pm$ 1.57                               | 7.26 $\pm$ 2.57                               | 7.88 $\pm$ 4.36                               |
| Mac3 <sup>+</sup> cells (% total cells)                | 49.7 $\pm$ 3.85                               | 47.8 $\pm$ 6.64                               | 56.7 $\pm$ 5.97                               | 31.9 $\pm$ 11.4                               |
| Plasma cholesterol content (mmol/l)                    | 12.4 $\pm$ 0.79                               | 16.7 $\pm$ 1.44                               | 11.2 $\pm$ 1.84                               | 13.5 $\pm$ 4.54                               |

All values are mean  $\pm$  SEM. No significant differences have been observed between male and female mice.

Supplemental Table 1b: Raw data of plasma CCL-2 levels

| sample         | <i>Cav1<sup>+/+</sup> Apoe<sup>-/-</sup></i> | <i>Cav1<sup>-/-</sup> Apoe<sup>-/-</sup></i> |
|----------------|----------------------------------------------|----------------------------------------------|
| 1              | 84.00                                        | 98.43                                        |
| 2              | 63.57                                        | 87.43                                        |
| 3              | 68.43                                        | 53.00                                        |
| 4              | 87.29                                        | 17.29                                        |
| 5              | 55.71                                        | 392.43                                       |
| 6              | 56.14                                        | 57.14                                        |
| 7              |                                              | 86.29                                        |
| 8              |                                              | 83.29                                        |
| 9              |                                              | 39.14                                        |
| mean $\pm$ SEM | 69.19 $\pm$ 28.24                            | 101.60 $\pm$ 33.87                           |
