# Supplementary material
Source: PubMed Central journal article supplement (PMC3672907)
Supplement: fj.11-183350.st2.pdf [file fj.11-183350.st2.pdf]

## Supplemental Table 2

**Supplemental Table 2: Plaque phenotypic characteristics of 17 and 26 week old mice (All values are mean  $\pm$  SEM. \* $p < 0.05$ ; \*\*\* $p < 0.001$  compared to *Cav1<sup>+/+</sup>Apoe<sup>-/-</sup>*)**

|                                       | 17 weeks                                    |                                             | 26 weeks                                    |                                             |
|---------------------------------------|---------------------------------------------|---------------------------------------------|---------------------------------------------|---------------------------------------------|
|                                       | <i>Cav1<sup>+/+</sup>Apoe<sup>-/-</sup></i> | <i>Cav1<sup>-/-</sup>Apoe<sup>-/-</sup></i> | <i>Cav1<sup>+/+</sup>Apoe<sup>-/-</sup></i> | <i>Cav1<sup>-/-</sup>Apoe<sup>-/-</sup></i> |
| CD45 (% of total cells)               | 5.6 $\pm$ 1.1                               | 7.2 $\pm$ 2                                 | 5 $\pm$ 0.7                                 | 4.1 $\pm$ 1.5                               |
| CD3 (% of total cells)                | 4.2 $\pm$ 0.9                               | 4.1 $\pm$ 1.6                               | 4.5 $\pm$ 0.6                               | 2.7 $\pm$ 1.2*                              |
| Mac3 (% of total cells)               | 65 $\pm$ 13.4                               | 52 $\pm$ 7.6                                | 48.2 $\pm$ 4.3                              | 41.1 $\pm$ 5.7                              |
| Mac3 (% of total cell/ini plaque)     | -                                           | -                                           | 43.2 $\pm$ 3.8                              | 53.2 $\pm$ 7.5                              |
| Mac3 (% of total cells/adv plaque)    | -                                           | -                                           | 47.5 $\pm$ 4.6                              | 27.3 $\pm$ 5*                               |
| LC (% of total area)                  | 8.5 $\pm$ 4.8                               | 6.7 $\pm$ 2.4                               | 15.7 $\pm$ 4.2                              | 4.5 $\pm$ 2.9                               |
| Caspase-3                             | 13 cases                                    | 2 cases***                                  | 14 cases                                    | 1 case***                                   |
| SR (% of total plaque area)           | 24.7 $\pm$ 10.1                             | 19.4 $\pm$ 11.2                             | 42.5 $\pm$ 9.8                              | 50.8 $\pm$ 5.6                              |
| $\alpha$ SMA (% of total plaque area) | 9.3 $\pm$ 4.2                               | 26.44 $\pm$ 26.44                           | 11 $\pm$ 2.9                                | 12.9 $\pm$ 5.7                              |
| Tregs                                 | no positive cells                           | no positive cells                           | no positive cells                           | no positive cells                           |
| FVIII                                 | no disruption                               | no disruption                               | no disruption                               | no disruption                               |
| perl's iron                           | no positive staining                        | no positive staining                        | no positive staining                        | no positive staining                        |
